# Supplementary material for: Inducible Nitric Oxide Synthase Is a Key Host Factor for Toxoplasma GRA15-Dependent Disruption of the Gamma Interferon-Induced Antiparasitic Human Response
Source: PubMed Central journal article supplement (PMC6178625; doi:10.1128/mbio.01738-18), 2018-10-09

# Figure S1\_Bando et al.

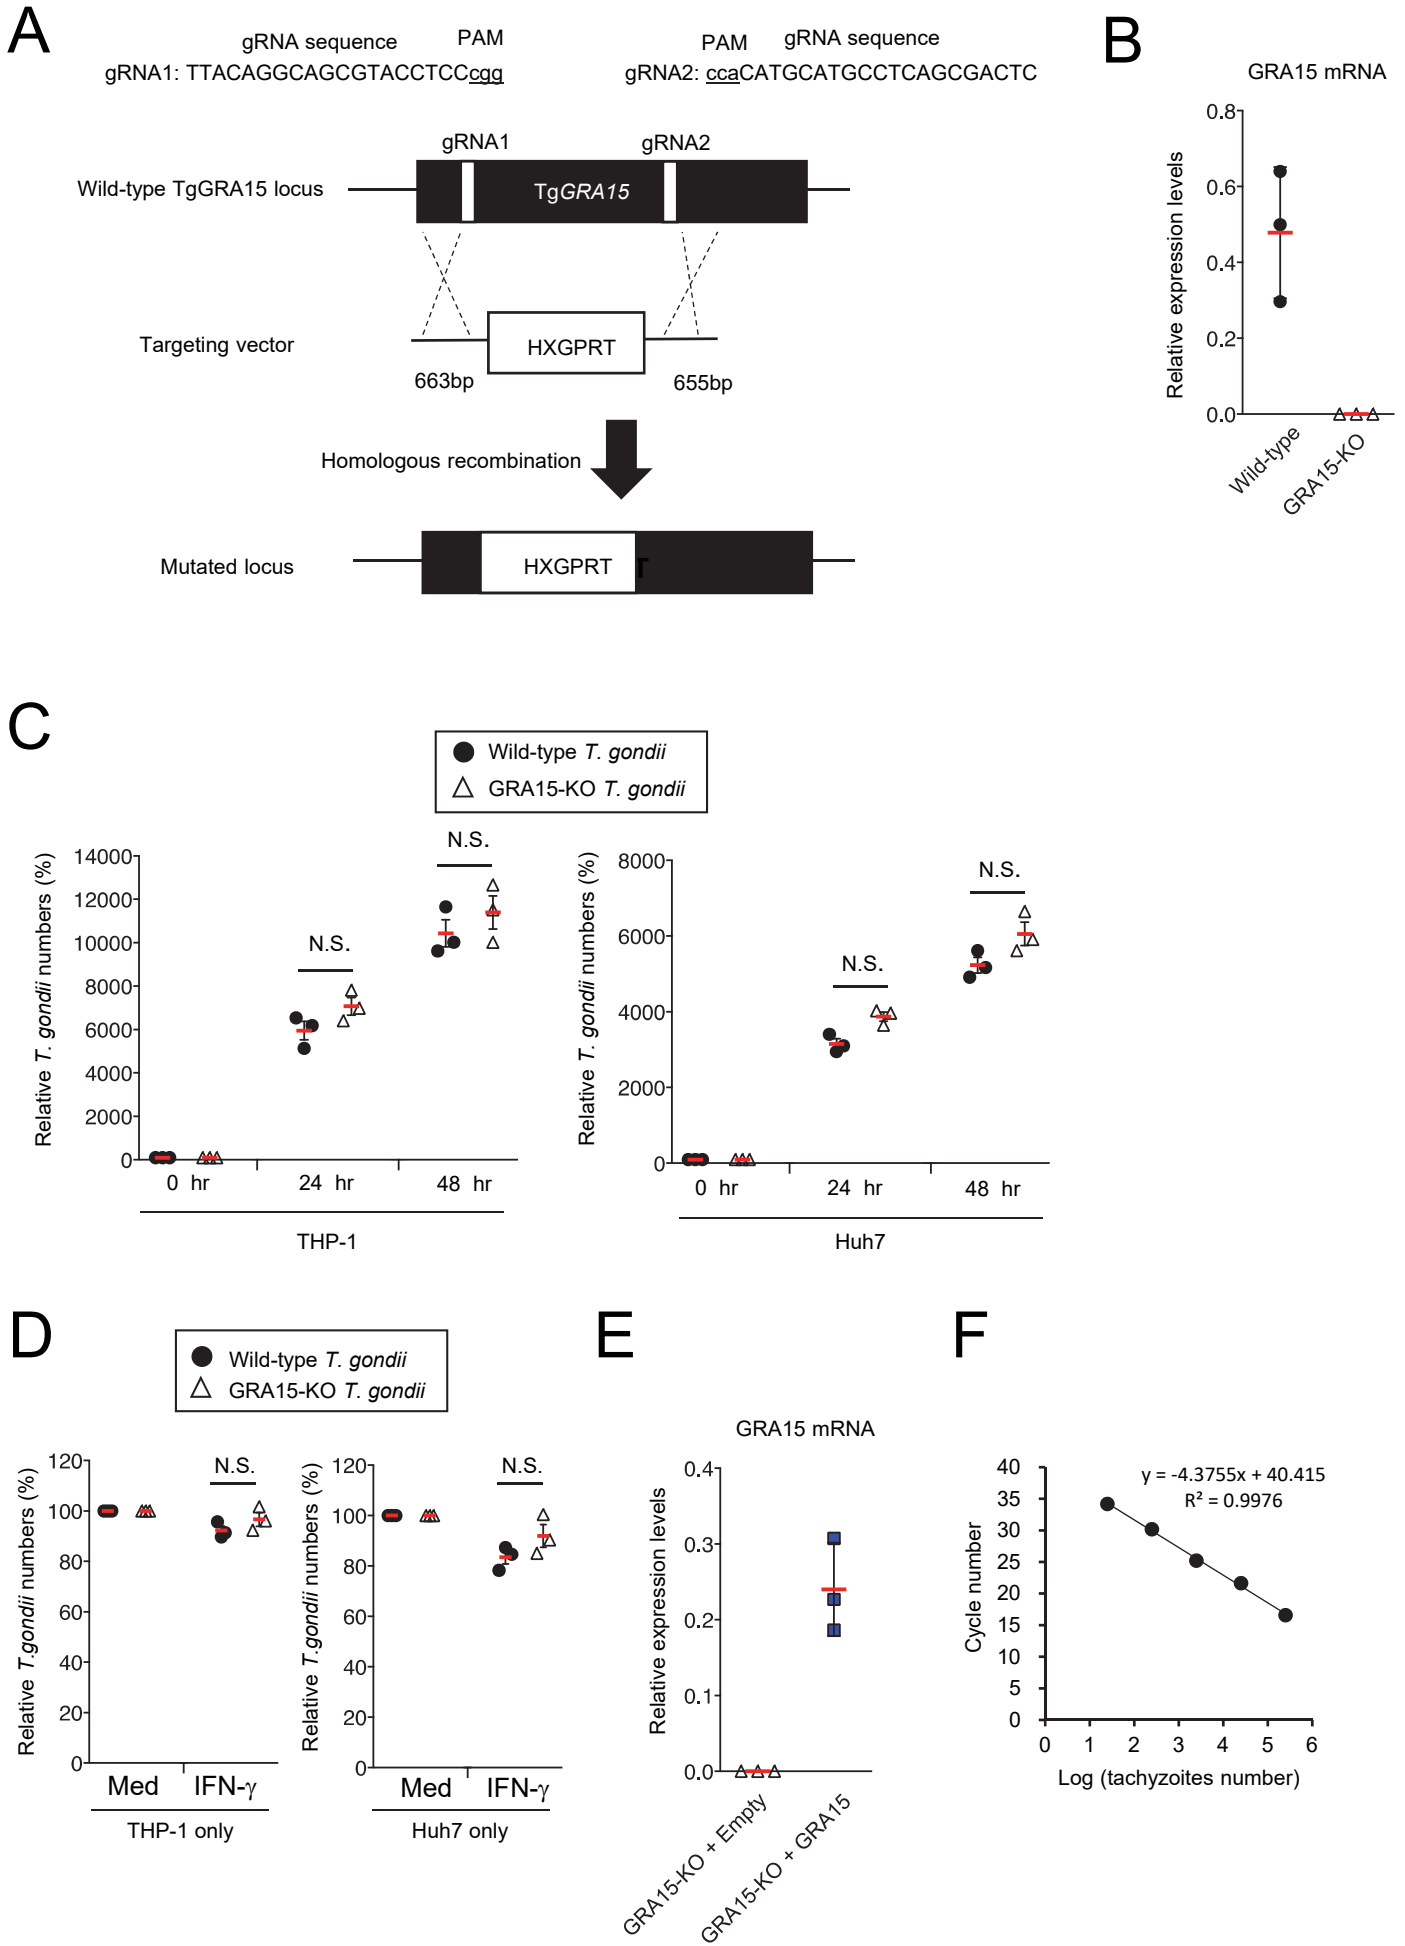

Supplement: mbo005184099sf1.pdf [file mbo005184099sf1.pdf]
